# Supplementary material for: Combination of Amphiphilic Cyclic Peptide [R4W4] and Levofloxacin against Multidrug-Resistant Bacteria
Source: MDPI journal article supplement (doi:10.3390/antibiotics11030416), 2022-03-20

## SUPPLEMENTARY INFORMATION

# Combination of Amphiphilic Cyclic Peptide [R<sub>4</sub>W<sub>4</sub>] and Levofloxacin Against Multidrug-Resistant Bacteria

Muhammad Imran Sajid<sup>1,2</sup>, Sandeep Lohan<sup>1</sup>, Shun Kato<sup>1</sup>, Rakesh Kumar Tiwari<sup>1,\*</sup>

<sup>1</sup> Center for Targeted Drug Delivery, Department of Biomedical and Pharmaceutical Sciences, Chapman University School of Pharmacy, Harry and Diane Rinker Health Science Campus, Irvine, CA 92618, USA

<sup>2</sup> Faculty of Pharmacy, University of Central Punjab, Lahore 54000, Pakistan

\* Corresponding author:  
Rakesh Kumar Tiwari, Ph.D.  
Chapman University School of Pharmacy  
Harry and Diane Rinker Health Science Campus  
#263, 9401 Jeronimo Road  
Irvine, CA, 92618, USA  
[tiwari@chapman.edu](mailto:tiwari@chapman.edu); Tel: +1-714-516-5483; Fax: +1-714-516-5481

## Content

- |                                  |       |
|----------------------------------|-------|
| 1. MALDI Mass Spectrums          | S2-S6 |
| 2. Analytical HPLC Chromatograms | S7-S9 |

# 1. MALDI-TOF mass spectrum of linear peptide (R<sub>4</sub>W<sub>4</sub>)

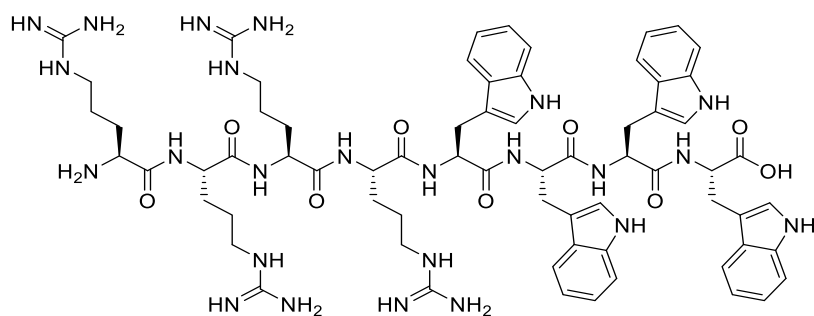

Chemical Formula: C<sub>68</sub>H<sub>90</sub>N<sub>24</sub>O<sub>9</sub>  
Exact Mass: 1386.7323

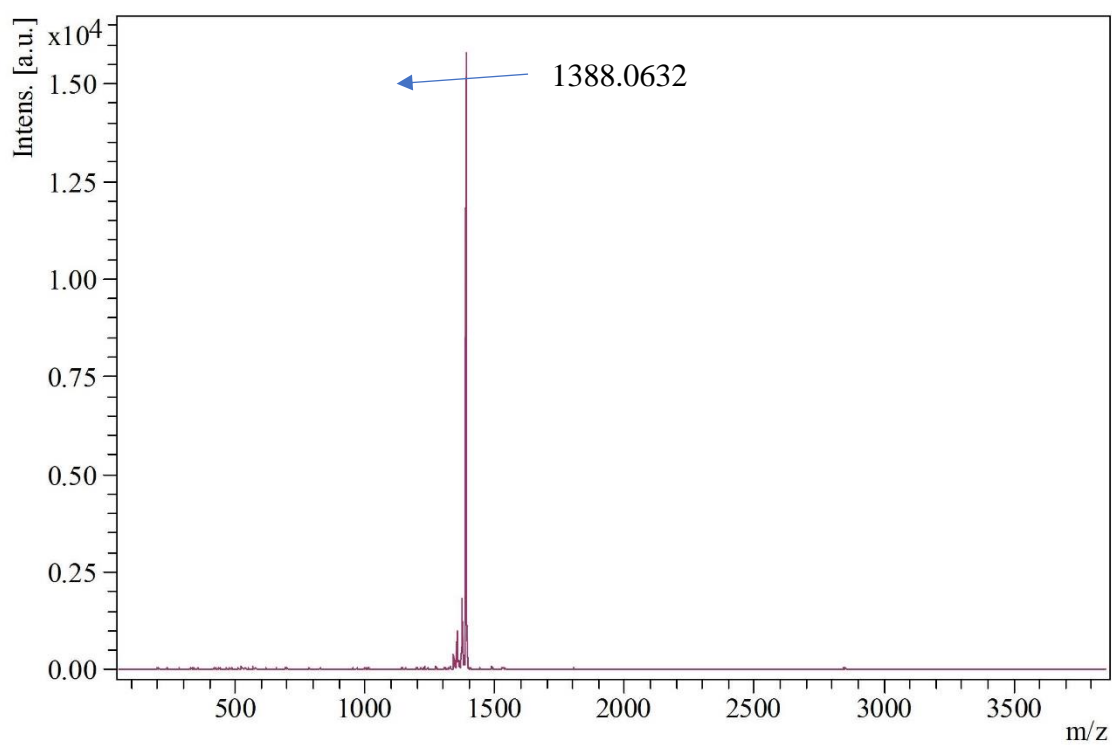

| m/z       | S/N | Quality Fac. | Res. | Intens. | Area  |
|-----------|-----|--------------|------|---------|-------|
| 1340.9943 | 20  | 1924         | 520  | 207     | 1363  |
| 1354.6184 | 55  | 2084         | 886  | 733     | 259   |
| 1359.8750 | 13  | 2545         | 762  | 149     | 74    |
| 1372.0041 | 13  | 96.0         | 538  | 165     | 98    |
| 1374.4433 | 95  | 3748         | 919  | 1278    | 4478  |
| 1384.6683 | 6   | 4.88         | 1201 | 87.1    | 237   |
| 1388.0632 | 884 | 235389       | 957  | 11904   | 40730 |

## 2. MALDI-TOF mass spectrum of cyclic peptide [R<sub>4</sub>W<sub>4</sub>]

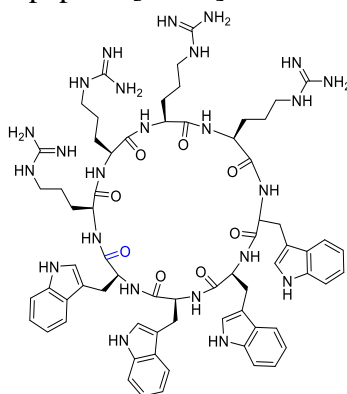

Chemical Formula: C<sub>68</sub>H<sub>88</sub>N<sub>24</sub>O<sub>8</sub>  
Exact Mass: 1368.7217

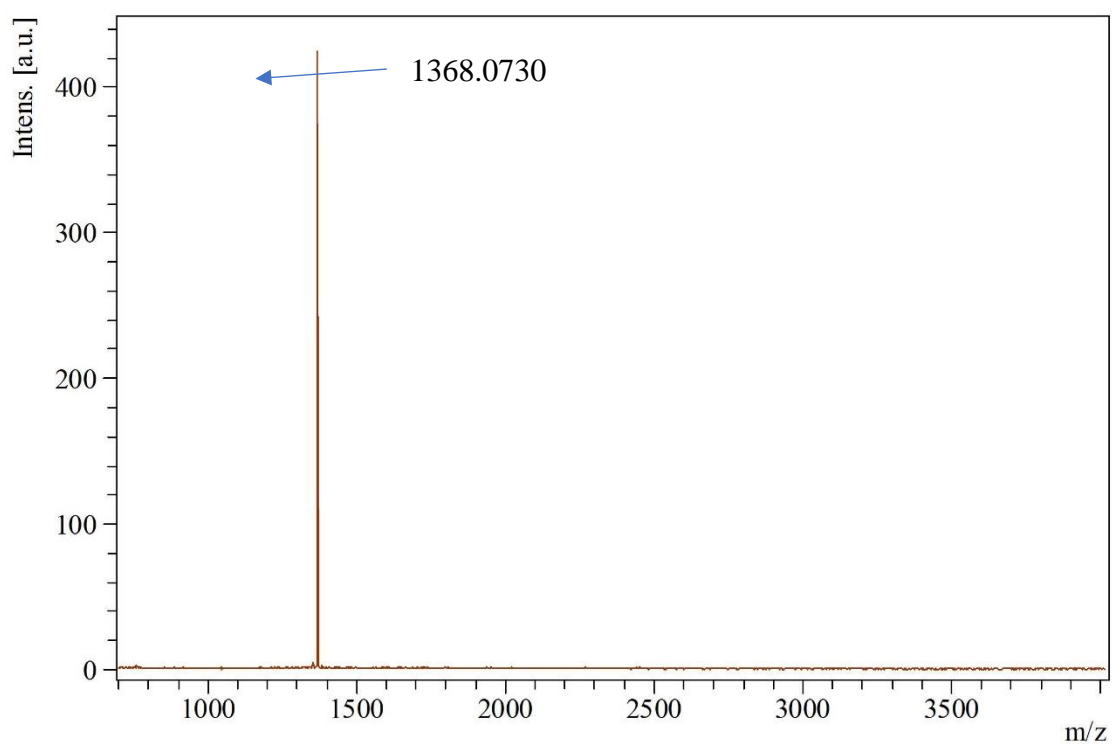

| m/z       | S/N | Quality Fac. | Res. | Intens. | Area |
|-----------|-----|--------------|------|---------|------|
| 1368.0730 | 36  | 3468         | 4712 | 424     | 288  |

3. MALDI-TOF mass spectrum of the test cleavage of peptidyl resin to monitor the reaction mixture after 2 h for the coupling of 10-hydroxydecanoic acid (10-HDA) with the linear peptide (Dde-K(NH<sub>2</sub>)-(R(Pbf))<sub>3</sub>(W(Boc))<sub>4</sub>) on chlorotrityl resin using HBTU and DIPEA in the DMF.

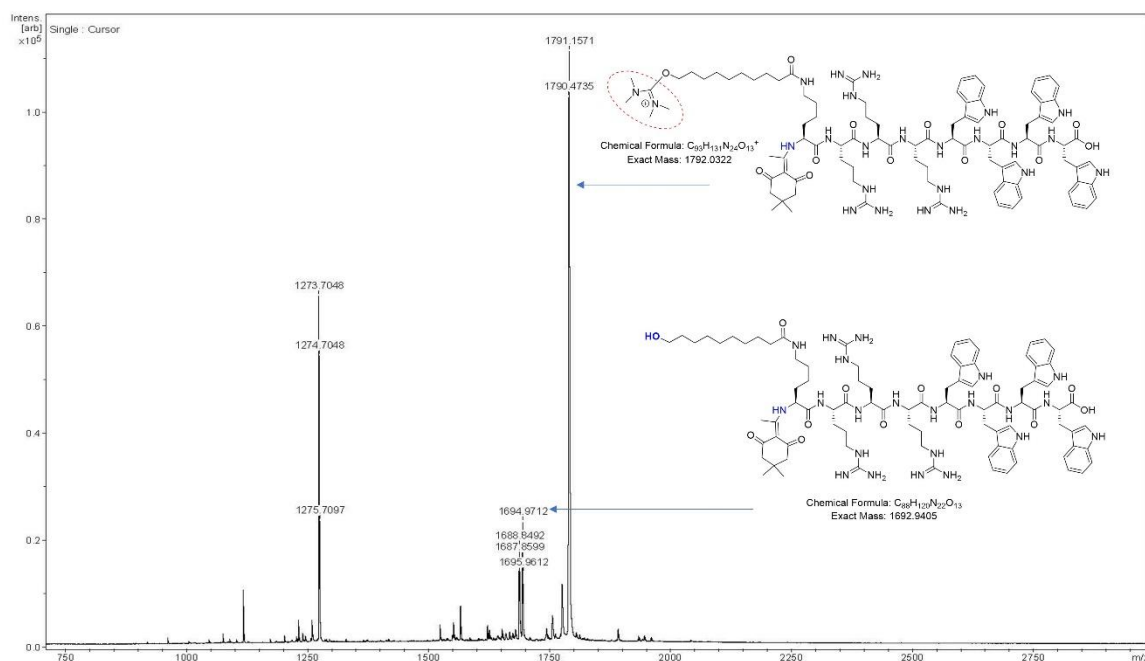

#### 4. MALDI-TOF mass spectrum of linear peptide Levo conjugate (Levo-C<sub>10</sub>-KR<sub>3</sub>W<sub>4</sub>)

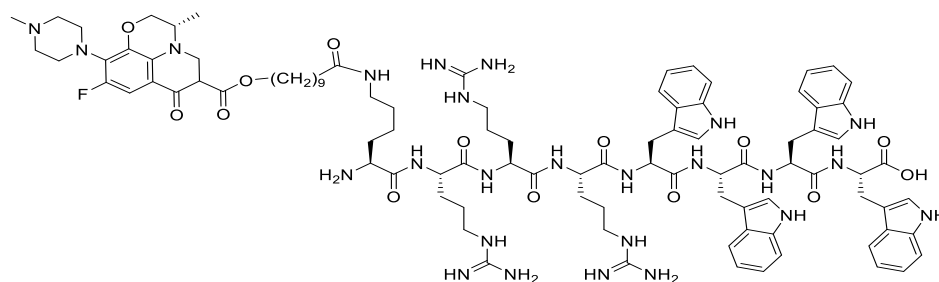

Chemical Formula: C<sub>96</sub>H<sub>128</sub>FN<sub>25</sub>O<sub>14</sub>  
Exact Mass: 1874.0057

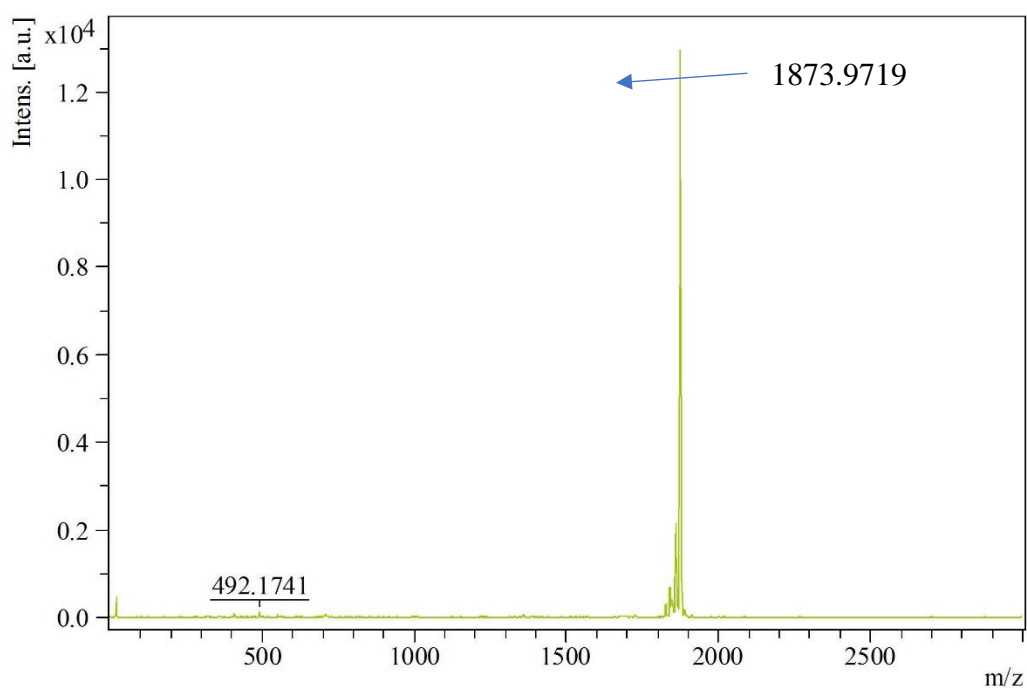

| m/z       | S/N | Quality    | Fac. | Res. | Intens. | Area |
|-----------|-----|------------|------|------|---------|------|
| 21.9660   | 10  | 158        | 594  | 124  | 5.64    |      |
| 22.0464   | 6   | 147        | 854  | 81.4 | 2.25    |      |
| 22.1575   | 17  | 700        | 735  | 207  | 6.72    |      |
| 22.2192   | 19  | 236        | 672  | 237  | 8.37    |      |
| 22.2936   | 36  | 497        | 705  | 458  | 15.4    |      |
| 22.3681   | 40  | 464        | 696  | 501  | 17.1    |      |
| 22.4466   | 22  | 264        | 728  | 278  | 9.17    |      |
| 22.5222   | 7   | 89.6       | 851  | 83.3 | 2.35    |      |
| 22.5953   | 9   | 159        | 581  | 117  | 5.46    |      |
| 22.7311   | 13  | 166        | 655  | 162  | 7.03    |      |
| 22.8040   | 7   | 137        | 883  | 92.4 | 3.02    |      |
| 22.8809   | 6   | 207        | 778  | 78.9 | 2.52    |      |
| 23.0239   | 9   | 505        | 582  | 115  | 4.84    |      |
| 492.1741  | 8   | 1520       | 1498 | 108  | 55.4    |      |
| 1826.6876 | 15  | 17117      | 675  | 132  | 1152    |      |
| 1840.1408 | 41  | 9663       | 842  | 364  | 2600    |      |
| 1845.8078 | 21  | 4278       | 613  | 166  | 1748    |      |
| 1859.8388 | 117 | 15364      | 747  | 998  | 8321    |      |
| 1868.1896 | 9   | 151        | 492  | 88.5 | 1057    |      |
| 1873.9719 | 723 | 2.174316e6 | 1017 | 7393 | 42699   |      |

## 5. MALDI-TOF mass spectrum of cyclic peptide Levo conjugate [Levo-C<sub>10</sub>-KR<sub>3</sub>W<sub>4</sub>]

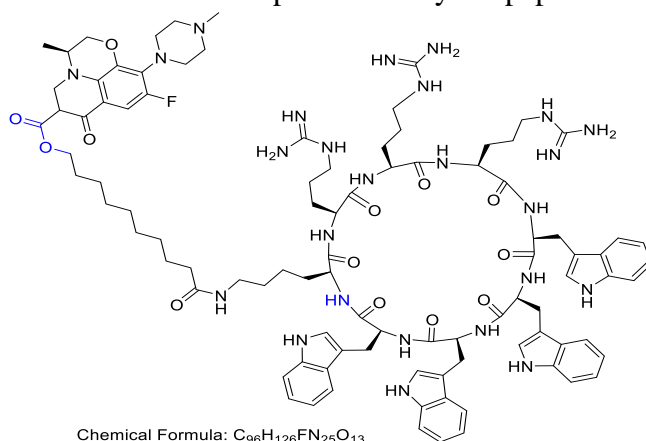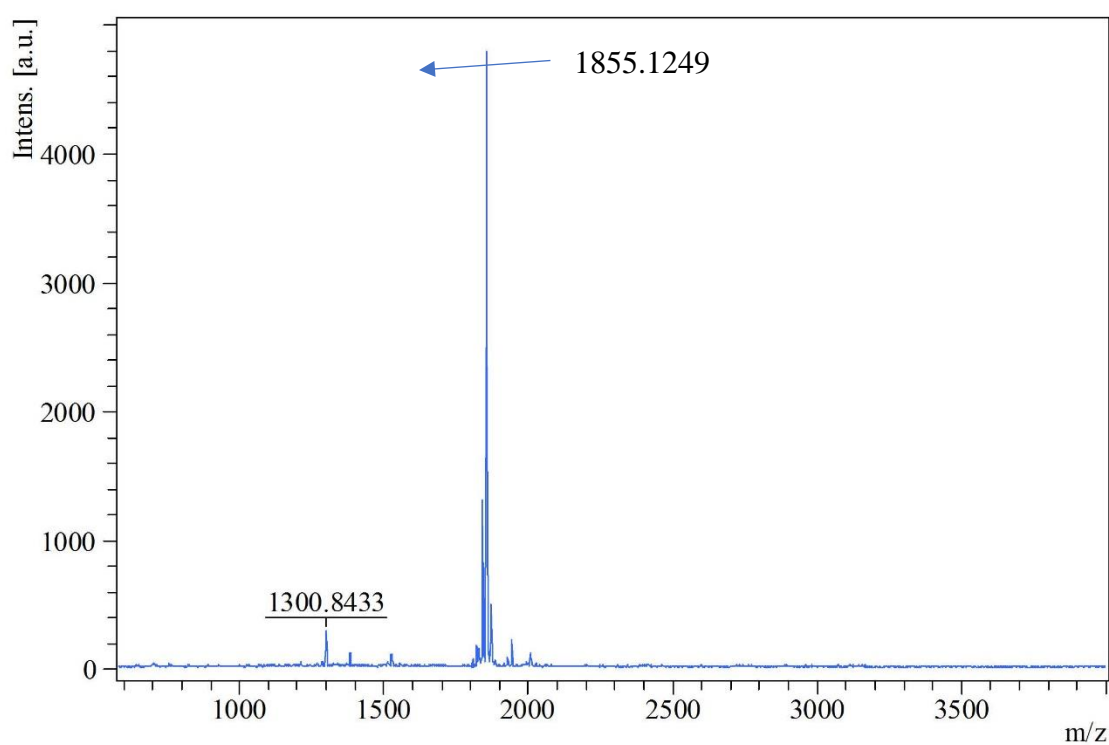

| m/z       | S/N | Quality Fac. | Res. | Intens. | Area  |
|-----------|-----|--------------|------|---------|-------|
| 1300.8433 | 16  | 58348        | 2503 | 292     | 390   |
| 1821.3029 | 8   | 3412         | 1982 | 130     | 422   |
| 1841.0730 | 63  | 168137       | 2404 | 1052    | 2808  |
| 1855.1249 | 236 | 225664       | 2436 | 3910    | 10399 |
| 1868.0990 | 8   | 454          | 2405 | 129     | 372   |
| 1871.1541 | 23  | 3250         | 2597 | 437     | 984   |
| 1942.1810 | 11  | 32376        | 3289 | 191     | 387   |
| 2007.1052 | 6   | 4492         | 2919 | 93.8    | 236   |

**6. Analytical HPLC analysis.** The purity of linear ( $R_4W_4$ ) and cyclic [ $R_4W_4$ ] peptides and their respective Levo conjugates were determined using a reverse-phase analytical HPLC (Shimadzu; LC-20ADXR). Method 1 was used to determine the purity of the linear ( $R_4W_4$ ) and cyclic [ $R_4W_4$ ] peptides. Method 2 was used to determine the purity of Levo conjugates of linear and cyclic peptides.

#### **Method 1:**

**Column:** Phenomenex (Luna), 4  $\mu$ m, C18, 150  $\times$  4.6 mm

**Flow rate:** 0.5 ml/min

**Mobile Phase:** Buffer A-Water containing 0.1% TFA

Buffer B-Acetonitrile containing 0.1% TFA

#### **Gradient**

| Time (min) | Buffer B (%) |
|------------|--------------|
| 0.01       | 5            |
| 2          | 5            |
| 5          | 10           |
| 25         | 70           |
| 27         | 95           |
| 32         | 95           |
| 32.01      | 5            |
| 38         | 5            |

#### **Method 2**

**Column:** Phenomenex (Luna), 4  $\mu$ m, C18, 150  $\times$  4.6 mm

**Flow rate:** 0.5 ml/min

**Mobile Phase:** Buffer A- Water containing 0.1% TFA

Buffer B- Methanol containing 0.1% TFA

| Time (min) | Buffer B (%) |
|------------|--------------|
| 0.01       | 5            |
| 2          | 5            |
| 10         | 20           |
| 25         | 65           |
| 27         | 95           |
| 32         | 95           |
| 32.01      | 5            |
| 38         | 5            |

**6A. HPLC Chromatograms of**

linear peptide ( $R_4W_4$ )

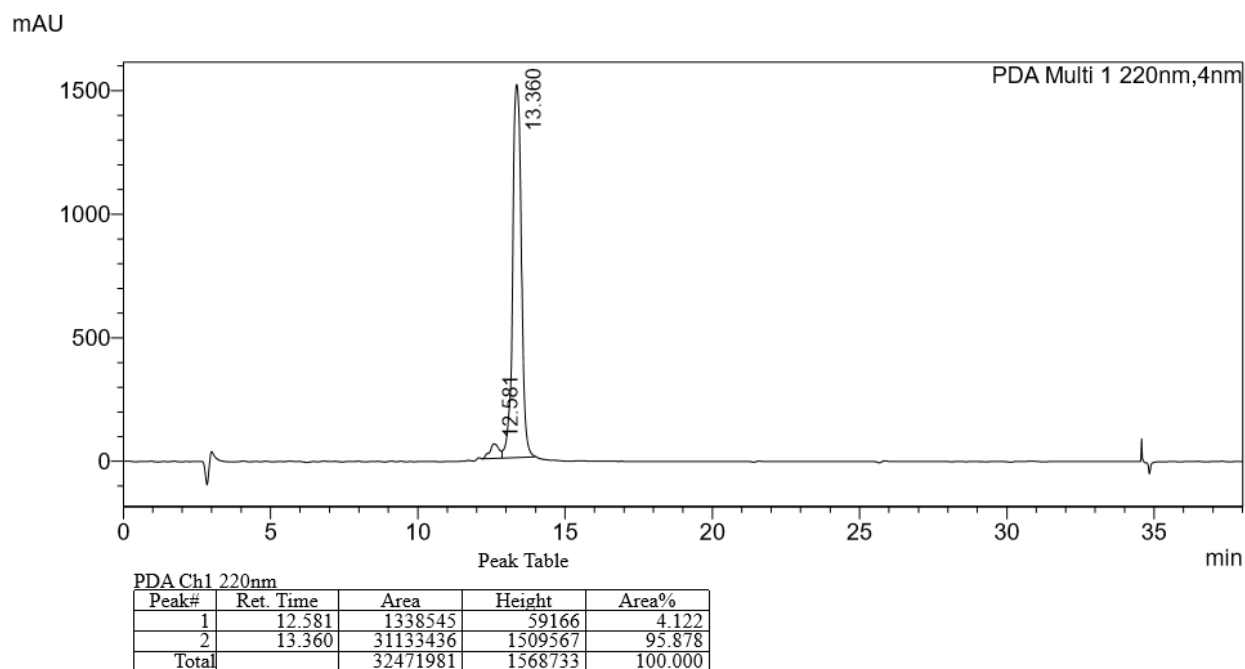

## 6B. HPLC Chromatograms of cyclic peptide [R<sub>4</sub>W<sub>4</sub>]

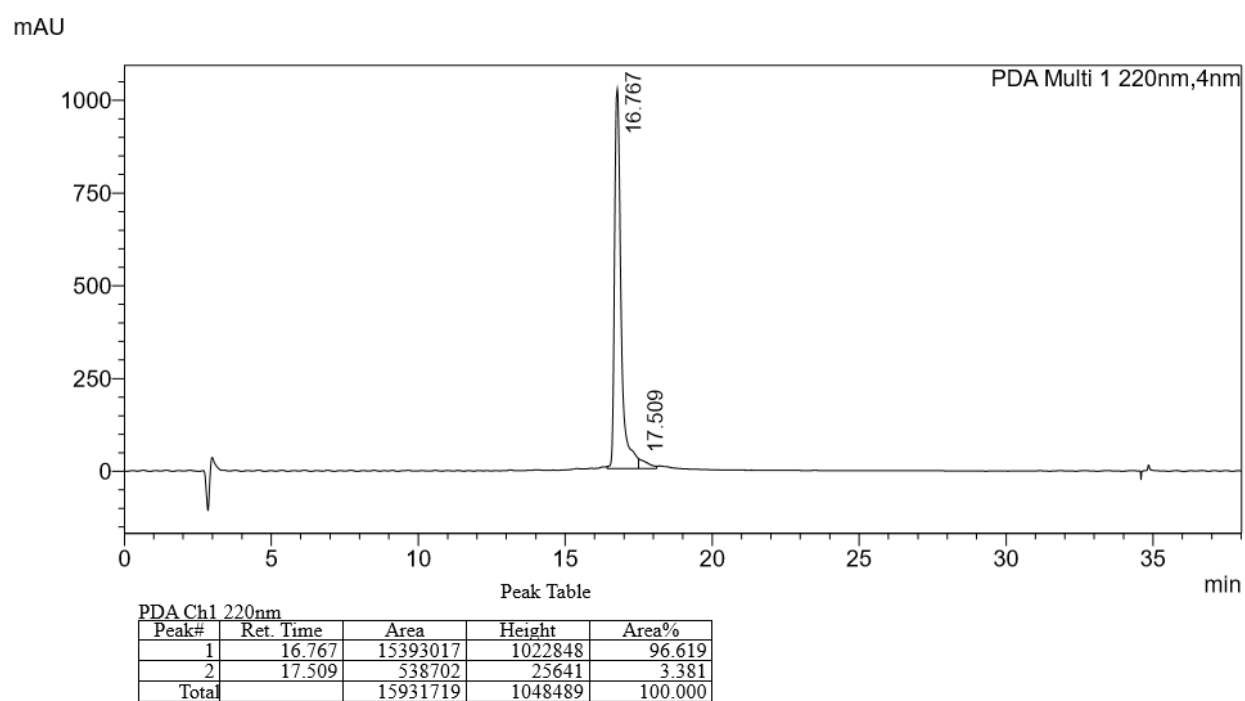

## 6C. HPLC Chromatograms of linear peptide levofloxacin conjugate (Levo-C<sub>10</sub>-KR<sub>3</sub>W<sub>4</sub>)



mAU

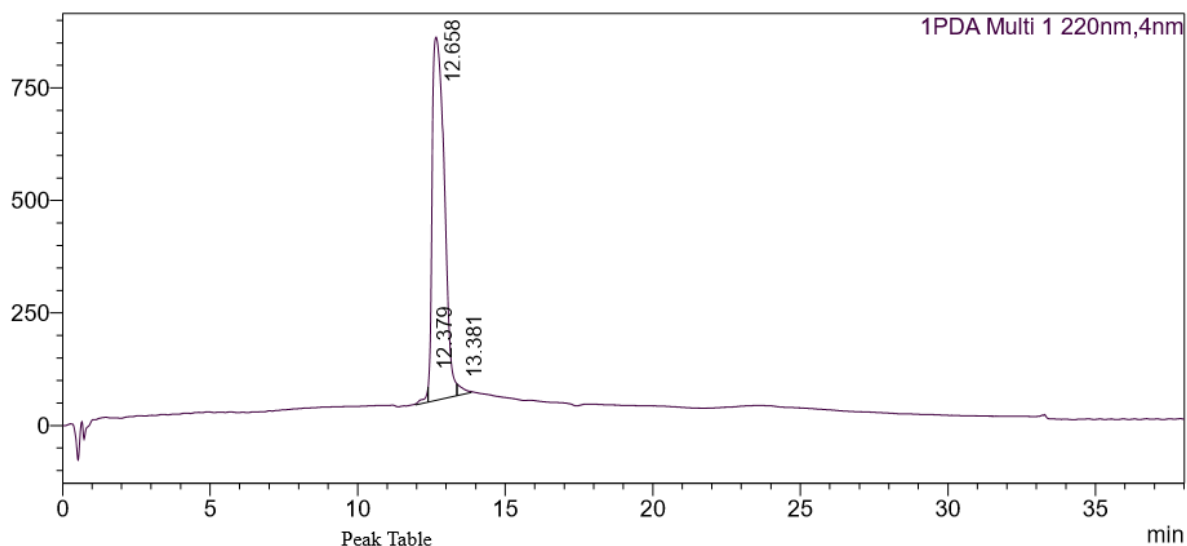

#### 6D. HPLC Chromatograms of cyclic peptide Levo conjugate [Levo-C<sub>10</sub>-KR<sub>3</sub>W<sub>4</sub>]

mAU

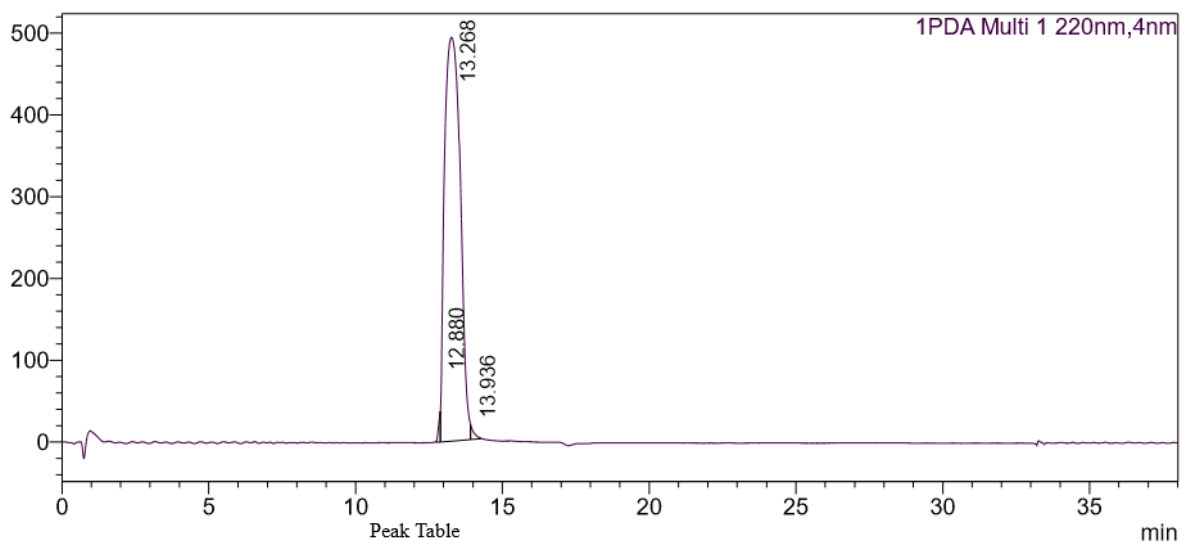

Supplement: s1 [file s1]
